# Supplementary material for: Yeast-based reference materials for quantitative metabolomics
Source: PubMed Central journal article supplement (PMC9142427; doi:10.1007/s00216-021-03694-w), 2021-10-13
Supplement: 216_2021_3694_MOESM1_ESM.pdf [file 216_2021_3694_MOESM1_ESM.pdf]

# Supporting Information for

## Yeast based reference materials for quantitative metabolomics

Hendri Wasito<sup>a,b</sup>, Gerrit Hermann<sup>c,d</sup>, Veronika Fitz<sup>e</sup>, Christina Troyer<sup>a</sup>, Stephan Hann<sup>a</sup>,  
Gunda Koellensperger<sup>e,f\*</sup>

<sup>a</sup>Institute of Analytical Chemistry, Department of Chemistry, University of Natural Resources and Life Sciences (BOKU) Vienna, Muthgasse 18, 1190 Vienna, Austria.

<sup>b</sup>Department of Pharmacy, Faculty of Health Sciences, Jenderal Soedirman University, Dr. Soeparno Street, 53122 Purwokerto, Indonesia.

<sup>c</sup>Core Facility Mass Spectrometry, University of Natural Resources and Life Sciences (BOKU) Vienna, Muthgasse 11, 1190 Vienna, Austria.

<sup>d</sup>ISOtopic solutions, Waehringer Str. 38, 1090 Vienna, Austria

<sup>e</sup>Department of Analytical Chemistry, Faculty of Chemistry, University of Vienna, Waehringer Str. 38, 1090 Vienna, Austria

<sup>f</sup>Vienna Metabolomics Center (VIME), University of Vienna, Althanstraße 14, 1090 Vienna, Austria

Correspondence to be addressed to:

Gunda Koellensperger

Department of Analytical Chemistry, Faculty of Chemistry, University of Vienna, Waehringer Str. 38, 1090 Vienna, Austria.

E-mail: gunda.koellensperger@univie.ac.at

**Table of contents:**

- Table S1.** Summary of monitored GC-MS/MS transition ion parameters in positive mode for investigated metabolites.
- Table S2.** Summary of monitored HILIC-HRMS accurate masses for the investigated metabolites.
- Table S3.** Multicomponent homogeneity of in-house yeast-based reference materials.
- Table S4.** Stability data from some selected metabolites of in-house yeast-based reference materials.
- Table S5.** Inter-batch biological reproducibility from some selected metabolites of in-house yeast-based reference materials.
- Table S6.** In-house yeast-based standard reference materials interlaboratory comparison from some selected metabolites.
- Table S7.** Characterization and quantification of uncertainty source for the preparation of standard calibration for threonine quantification in reference material

**Figure of contents:**

- Fig. S1.** Inter-batch biological reproducibility for in-house yeast-based standard reference materials.
- Fig. S2.** Variability comparison between biological reproducibility and homogeneity for in-house yeast-based standard reference materials.

**Table S1.** Summary of monitored GC-MS/MS transition ion parameters in positive mode for investigated metabolites. Fully <sup>13</sup>C-labeled yeast extract was used as an internal standard.

| Abbr.    | Compound                   | Segment | Precursor ion |       | Product ion |       | RT (min) | Coll. E. (eV) |
|----------|----------------------------|---------|---------------|-------|-------------|-------|----------|---------------|
|          |                            |         | Target        | ISTD  | Target      | ISTD  |          |               |
| 2PG      | 2-Phosphoglyceric acid     | 10      | 459.1         | 462.1 | 299.1       | 299.1 | 16.81    | 10            |
| 3PG      | 3-Phosphoglyceric acid     | 10      | 459.1         | 462.1 | 299.1       | 299.1 | 17.21    | 10            |
| cis-Ac   | Aconitic acid              | 9       | 375.1         | 381.1 | 285.1       | 291.1 | 16.16    | 5             |
| AAD      | alpha-Aminoadipic acid     | 8       | 362.2         | 368.2 | 244.1       | 249.1 | 15.87    | 10            |
| AKG      | alpha-Ketoglutaric acid    | 7       | 288.1         | 293.1 | 154         | 158   | 14.37    | 15            |
| Asp      | Aspartic acid              | 6       | 232.1         | 338.1 | 188.1       | 147.1 | 13.44    | 10            |
| CA       | Citric acid                | 11      | 273.1         | 278.1 | 229.1       | 233.1 | 17.55    | 10            |
| CYS      | Cystathionine              | 16      | 278.2         | 282.2 | 160.2       | 163.2 | 24.67    | 10            |
| DHAP     | Dihydroxyacetone phosphate | 10      | 414.1         | 417.2 | 299.1       | 372.1 | 16.88    | 10            |
| Fuc      | Fructose                   | 12      | 217.1         | 220.1 | 101         | 103   | 19.56    | 15            |
| F6P      | Fructose-6-phosphate       | 17      | 459.2         | 462.2 | 315.1       | 299.1 | 27.66    | 15            |
| Fum      | Fumaric acid               | 3       | 245.1         | 249.1 | 73.1        | 73.1  | 11.45    | 20            |
| Gal      | Galactose                  | 13      | 319.2         | 323.2 | 229.1       | 233.1 | 19.99    | 10            |
| GA       | Gluconic acid              | 14      | 333.1         | 337.1 | 143         | 146   | 21.35    | 15            |
| Glc+Man- |                            |         |               |       |             |       |          |               |
| Ol       | Glucose+Mannitol           | 13      | 319.2         | 323.2 | 229.1       | 233.1 | 20.14    | 10            |
| G6P      | Glucose-6-phosphate        | 17      | 471.2         | 475.2 | 387.1       | 387.1 | 27.92    | 15            |
| Glu      | Glutamic acid              | 7       | 246.1         | 250.1 | 156.1       | 160.1 | 14.63    | 10            |
| G3P      | Glycerol-3-phosphosphate   | 10      | 445.2         | 448.2 | 299.1       | 299.1 | 16.62    | 15            |
| Gly      | Glycine                    | 3       | 276.1         | 278.1 | 248.1       | 249.1 | 11.28    | 10            |
| Hse      | Homoserine                 | 5       | 320.2         | 324.2 | 230.1       | 147.1 | 12.67    | 20            |
| Iso      | Isocitric acid             | 11      | 273.1         | 278.1 | 83          | 87    | 17.44    | 10            |
| Lys      | Lysine                     | 12      | 434.2         | 322.2 | 156.1       | 161.1 | 19.39    | 5             |
| Mali     | Malic acid                 | 5       | 335.1         | 339.1 | 147.1       | 147.1 | 13.01    | 10            |
| Man      | Mannose                    | 13      | 319.2         | 323.2 | 229.1       | 233.1 | 19.9     | 10            |
| M6P      | Mannose-6-phosphate        | 17      | 471.2         | 475.2 | 387.1       | 387.1 | 28.21    | 15            |
| Met      | Methionine                 | 6       | 176.1         | 180.1 | 128.1       | 131.1 | 13.45    | 10            |
| GlcNAc   | Phenylalanine              | 7       | 294.1         | 303.1 | 147.1       | 147.1 | 14.73    | 5             |
| R5P      | Ribose-5-phosphate         | 15      | 459.2         | 462.2 | 315.1       | 315.1 | 23.85    | 10            |
| S7P      | Sedoheptulose-7-phosphate  | 19      | 471.2         | 475.2 | 387.1       | 387.1 | 30.88    | 10            |
| Ser      | Serine                     | 4       | 306.1         | 309.2 | 278.1       | 280.2 | 11.71    | 5             |
| Suc      | Succinic acid              | 3       | 247.1         | 251.1 | 147.1       | 73.1  | 11.07    | 30            |
| Thr      | Threonine                  | 4       | 320.2         | 324.2 | 147.1       | 147.1 | 12.04    | 20            |
| Trp      | Tryptophan                 | 16      | 202.1         | 211.1 | 73.1        | 73.1  | 24.68    | 15            |
| Val      | Valine                     | 3       | 218.1         | 220.1 | 100.1       | 101.1 | 10.3     | 5             |

**Table S2.** Summary of monitored HILIC-HRMS accurate masses for investigated metabolites.  $[M+H]^+$  and  $[M-H]^-$  were monitored in positive and negative polarities, respectively. Fully  $^{13}C$ -labeled yeast extract was used as an internal standard.

| Abbr.   | Compound                        | Positive |          |          | Negative |          |          |
|---------|---------------------------------|----------|----------|----------|----------|----------|----------|
|         |                                 | Target   | ISTD     | RT (min) | Target   | ISTD     | RT (min) |
| 3AMP+   | 3'-Adenosine monophosphate+     | 348.0704 | 358.1039 | 6.37     | 346.0558 | 356.0894 | 6.64     |
| 5AMP    | 5'-Adenosine monophosphate      |          |          |          |          |          |          |
| K-IVaI  | 3-Methyl-2-oxovaleric acid      | -        | -        | -        | 129.0557 | 135.0758 | 1.89     |
| MTAP    | 5'-Deoxy-5'-Methylthioadenosine | 298.0968 | 309.1337 | 1.71     | -        | -        | -        |
| cis-Ac  | Aconitic acid                   | -        | -        | -        | 173.0092 | 179.0293 | 2.66     |
| Ade     | Adenine                         | 136.0618 | 141.0785 | 2.19     | 134.0472 | 139.064  | 2.26     |
| Asin    | Adenosine                       | 268.104  | 278.1376 | 2.30     | -        | -        | -        |
| ADP     | Adenosine diphosphate           | 428.0367 | 438.0702 | 7.89     | -        | -        | -        |
| Ala     | Alanine                         | 90.055   | 93.065   | 5.11     | -        | -        | -        |
| AAD     | alpha-Aminoadipic acid          | 162.0761 | 168.0962 | 5.72     | 160.0615 | 166.0817 | 6.02     |
| AKG     | alpha-Ketoglutaric acid         | -        | -        | -        | 145.0142 | 150.031  | 4.20     |
| Arg     | Arginine                        | 175.119  | 181.1391 | 6.46     | 173.1044 | 179.1245 | 6.84     |
| ASA     | Argininosuccinic acid           | 291.1299 | 301.1635 | 7.43     | 289.1154 | 299.1489 | 7.68     |
| Asn     | Asparagine                      | 133.0608 | 137.0742 | 5.87     | 131.0462 | 135.0596 | 6.23     |
| Asp     | Aspartic acid                   | 134.0448 | 138.0582 | 6.52     | 132.0302 | 136.0437 | 6.78     |
| Car     | Carnitine                       | 162.1125 | 169.136  | 3.81     | -        | -        | -        |
| Cit     | Citrulline                      | 176.103  | 182.1231 | 5.94     | 174.0884 | 180.1085 | 6.30     |
| cGMP    | Cyclic guanosine monophosphate  | 346.0547 | 356.0883 | 5.40     | -        | -        | -        |
| CYS     | Cystathionine                   | 223.0747 | 230.0982 | 7.30     | 221.0602 | 228.0836 | 7.53     |
| Ctd     | Cytidine                        | 244.0928 | 253.123  | 3.20     | -        | -        | -        |
| CMP     | Cytidine monophosphate          | 324.0591 | 333.0893 | 6.96     | 322.0446 | 331.0748 | 7.27     |
| DHIV    | Dihydroxyisovaleric acid        | -        | -        | -        | 133.0506 | 138.0674 | 3.90     |
| FAD     | Flavin adenin dinucleotide      | 786.1644 | 813.255  | 6.73     | -        | -        | -        |
| F6P     | Fructose-6-phosphate            | -        | -        | -        | 259.0224 | 265.0426 | 7.39     |
| Fum     | Fumaric acid                    | -        | -        | -        | 115.0037 | 119.0171 | 4.09     |
| Glu     | Glutamic acid                   | 148.0604 | 153.0772 | 6.07     | 146.0619 | 151.0627 | 6.35     |
| Gln     | Glutamine                       | 147.0764 | 152.0932 | 5.73     | 145.0619 | 150.0786 | 6.10     |
| Glu-Cys | Glutamyl-cysteine               | 251.0696 | 259.0965 | 6.35     | -        | -        | -        |
| GSSG    | Glutathione, oxidized           | 613.1592 | 637.2263 | 8.07     | 611.1447 | 631.2118 | 8.26     |
| GSH     | Glutathione, reduced            | 308.0911 | 318.1246 | 6.37     | 306.0765 | 316.1101 | 6.65     |
| Gnin    | Guanine                         | 152.0567 | 157.0735 | 2.79     | -        | -        | -        |
| Gsin    | Guanosine                       | 284.0989 | 294.1325 | 3.34     | -        | -        | -        |
| GMP     | Guanosine monophosphate         | 364.0653 | 374.0988 | 6.97     | 362.0507 | 372.0843 | 7.26     |
| His     | Histidine                       | 156.6768 | 162.0969 | 6.47     | 154.0622 | 160.0823 | 6.84     |
| Hse     | Homoserine                      | 120.0655 | 124.0789 | 5.42     | -        | -        | -        |
| Isin    | Inosine                         | 269.088  | 279.1216 | 2.80     | -        | -        | -        |
| IMP     | Inosine monophosphate           | 349.0544 | 359.0879 | 6.57     | -        | -        | -        |
| Igsin   | Isoguanosine                    | 284.0989 | 294.1325 | 3.34     | -        | -        | -        |
| Ile     | Isoleucine                      | 132.1019 | 138.122  | 3.12     | -        | -        | -        |

|       |                           |          |          |      |          |          |      |
|-------|---------------------------|----------|----------|------|----------|----------|------|
| KYN   | Kynurenine                | 209.0921 | 219.1256 | 2.84 | -        | -        | -    |
| Leu   | Leucine                   | 132.1019 | 138.122  | 2.93 | -        | -        | -    |
| Lys   | Lysine                    | 147.1128 | 153.1329 | 6.65 | -        | -        | -    |
| Met   | Methionine                | 150.0583 | 155.0759 | 3.40 | -        | -        | -    |
| MVA   | Mevalonic acid            | -        | -        | -    | 147.0663 | 153.0864 | 2.08 |
| OAS   | N-Acetylserine            | 148.0604 | 153.0772 | 6.07 | -        | -        | -    |
| NAD+  | NAD+                      | 664.1164 | 685.1869 | 7.14 | 662.6018 | 683.1723 | 7.44 |
| NADH  | NADH                      | 666.132  | 687.2025 | 6.86 | 664.1175 | 685.1879 | 7.16 |
| NADP+ | NADP+                     | 744.0827 | 765.1532 | 7.96 | -        | -        | -    |
| NAA   | Nicotinamide              | 123.0553 | 129.0754 | 1.78 | -        | -        | -    |
| Orn   | Ornithine                 | 133.0972 | 138.1139 | 6.69 | -        | -        | -    |
| Phe   | Phenylalanine             | 166.0863 | 175.1164 | 2.82 | -        | -        | -    |
| Pro   | Proline                   | 116.0706 | 121.0874 | 4.01 | -        | -        | -    |
| PsU   | Pseudouridine             | -        | -        | -    | 243.0623 | 252.0925 | 3.63 |
| R5P   | Ribose-5-phosphate        | -        | -        | -    | 229.0119 | 234.0287 | 6.70 |
| SAH   | S-Adenosyl-L-homocysteine | 385.1289 | 399.1758 | 5.80 | -        | -        | -    |
| Ser   | Serine                    | 106.0499 | 109.0599 | 5.80 | -        | -        | -    |
| Sped  | Spermidine                | 146.1652 | 153.1887 | 7.05 | -        | -        | -    |
| Suc   | Succinic acid             | -        | -        | -    | 117.0193 | 121.0328 | 2.00 |
| Thr   | Threonine                 | 120.1655 | 124.0789 | 5.33 | -        | -        | -    |
| Trp   | Tryptophan                | 205.0972 | 216.1341 | 2.72 | -        | -        | -    |
| Tyr   | Tyrosine                  | 182.0812 | 191.1114 | 3.78 | -        | -        | -    |
| Uri   | Uridine                   | -        | -        | -    | 243.0623 | 256.0925 | 3.63 |
| UMP   | Uridine monophosphate     | 325.0431 | 334.0733 | 6.42 | 323.0286 | 332.0588 | 6.72 |

**Table S3.** Multicomponent homogeneity of in-house yeast-based reference materials. (n = 6 for intra-batch measurement; n = 3 and n = 4 for HILIC-HRMS and GC-MS/MS technical replicate measurement, respectively).

| Abbr.   | Compound                        | Polarity | Method     | Concentration                      |        | Technical Replicate CV (%) |
|---------|---------------------------------|----------|------------|------------------------------------|--------|----------------------------|
|         |                                 |          |            | Average (nmol vial <sup>-1</sup> ) | CV (%) |                            |
| 3AMP+   | 3'-Adenosine monophosphate      | Negative | HILIC-HRMS | 80.99                              | 3.09   | 1.66                       |
| 5AMP    | +5'-Adenosine monophosphate     |          |            |                                    |        |                            |
| 2PG     | 2-Phosphoglyceric acid          | Positive | GC-MS/MS   | 0.17                               | 3.45   | 4.63                       |
| K-IVal  | 3-Methyl-2-oxovaleric acid      | Negative | HILIC-HRMS | 4.41                               | 55.48  | 13.07                      |
| 3PG     | 3-Phosphoglyceric acid          | Positive | GC-MS/MS   | 1.01                               | 1.41   | 4.44                       |
| MTAP    | 5'-Deoxy-5'-Methylthioadenosine | Positive | HILIC-HRMS | 4.00                               | 3.23   | 0.87                       |
| cis-Ac  | Aconitic acid                   | Positive | GC-MS/MS   | 0.45                               | 8.84   | 6.97                       |
| Ade     | Adenine                         | Positive | HILIC-HRMS | 0.42                               | 6.86   | 2.78                       |
| Asin    | Adenosine                       | Positive | HILIC-HRMS | 1.36                               | 2.30   | 2.15                       |
| ADP     | Adenosine diphosphate           | Positive | HILIC-HRMS | 87.19                              | 8.88   | 15.88                      |
| Ala     | Alanine                         | Positive | HILIC-HRMS | 1051.65                            | 2.31   | 0.34                       |
| AAD     | alpha-Aminoadipic acid          | Negative | HILIC-HRMS | 21.64                              | 3.78   | 0.37                       |
| AKG     | alpha-Ketoglutaric acid         | Negative | HILIC-HRMS | 85.51                              | 9.87   | 0.60                       |
| Arg     | Arginine                        | Positive | HILIC-HRMS | 1161.73                            | 2.30   | 0.16                       |
| ASA     | Argininosuccinic acid           | Positive | HILIC-HRMS | 23.16                              | 2.60   | 1.58                       |
| Asn     | Asparagine                      | Positive | HILIC-HRMS | 102.72                             | 2.22   | 0.93                       |
| Asp     | Aspartic acid                   | Positive | HILIC-HRMS | 1627.90                            | 2.83   | 0.37                       |
| Car     | Carnitine                       | Positive | HILIC-HRMS | 0.90                               | 0.16   | 0.11                       |
| CA      | Citric acid                     | Positive | GC-MS/MS   | 22.57                              | 2.47   | 2.77                       |
| Cit     | Citrulline                      | Positive | HILIC-HRMS | 93.96                              | 2.64   | 0.15                       |
| cGMP    | Cyclic guanosine monophosphate  | Positive | HILIC-HRMS | 0.44                               | 4.50   | 10.06                      |
| CYS     | Cystathionine                   | Positive | HILIC-HRMS | 65.65                              | 2.70   | 0.56                       |
| Ctd     | Cytidine                        | Positive | HILIC-HRMS | 0.14                               | 1.44   | 2.53                       |
| CMP     | Cytidine monophosphate          | Positive | HILIC-HRMS | 8.96                               | 2.42   | 2.95                       |
| DHAP    | Dihydroxyacetone phosphate      | Positive | GC-MS/MS   | 0.04                               | 17.20  | 9.90                       |
| DHIV    | Dihydroxyisovaleric acid        | Negative | HILIC-HRMS | 9.51                               | 7.84   | 9.64                       |
| FAD     | Flavin adenin dinucleotide      | Positive | HILIC-HRMS | 1.54                               | 5.20   | 2.85                       |
| Fuc     | Fructose                        | Positive | GC-MS/MS   | 4.58                               | 3.21   | 2.87                       |
| F6P     | Fructose-6-phosphate            | Positive | GC-MS/MS   | 0.57                               | 6.66   | 2.14                       |
| Fum     | Fumaric acid                    | Positive | GC-MS/MS   | 31.38                              | 1.19   | 2.17                       |
| GA      | Gluconic acid                   | Positive | GC-MS/MS   | 3.26                               | 1.69   | 2.40                       |
| Glc+Man | Glucose+Mannitol                | Positive | GC-MS/MS   | 11.50                              | 4.33   | 0.40                       |
| -Ol     |                                 |          |            |                                    |        |                            |
| G6P     | Glucose-6-phosphate             | Positive | GC-MS/MS   | 1.54                               | 4.90   | 2.28                       |
| Glu     | Glutamic acid                   | Negative | HILIC-HRMS | 2889.74                            | 2.69   | 0.22                       |
| Gln     | Glutamine                       | Positive | HILIC-HRMS | 748.68                             | 2.41   | 0.43                       |
| Glu-Cys | Glutamyl-cysteine               | Positive | HILIC-HRMS | 4.88                               | 6.94   | 8.76                       |
| GSSG    | Glutathione, oxidized           | Positive | HILIC-HRMS | 106.02                             | 10.33  | 1.34                       |
| GSH     | Glutathione, reduced            | Positive | HILIC-HRMS | 257.31                             | 7.65   | 0.86                       |
| G3P     | Glycerol-3-phosphosphate        | Positive | GC-MS/MS   | 12.70                              | 13.78  | 9.34                       |
| Gly     | Glycine                         | Positive | GC-MS/MS   | 63.66                              | 5.98   | 3.10                       |

|       |                           |          |            |         |       |       |
|-------|---------------------------|----------|------------|---------|-------|-------|
| Gnin  | Guanine                   | Positive | HILIC-HRMS | 0.15    | 3.50  | 1.97  |
| Gsin  | Guanosine                 | Positive | HILIC-HRMS | 0.19    | 5.27  | 3.01  |
| GMP   | Guanosine monophosphate   | Positive | HILIC-HRMS | 13.18   | 3.88  | 0.62  |
| His   | Histidine                 | Positive | HILIC-HRMS | 87.77   | 2.23  | 0.73  |
| Hse   | Homoserine                | Positive | HILIC-HRMS | 5.73    | 2.81  | 1.33  |
| Isin  | Inosine                   | Positive | HILIC-HRMS | 0.23    | 1.92  | 2.61  |
| IMP   | Inosine monophosphate     | Positive | HILIC-HRMS | 0.82    | 8.03  | 12.44 |
| Iso   | Isocitric acid            | Positive | GC-MS/MS   | 0.72    | 6.15  | 6.34  |
| Igsin | Isoguanosine              | Positive | HILIC-HRMS | 0.34    | 2.18  | 1.43  |
| Ile   | Isoleucine                | Positive | HILIC-HRMS | 15.96   | 8.46  | 1.52  |
| KYN   | Kynurenine                | Positive | HILIC-HRMS | 0.84    | 5.36  | 0.36  |
| Leu   | Leucine                   | Positive | HILIC-HRMS | 12.94   | 4.21  | 7.22  |
| Lys   | Lysine                    | Positive | HILIC-HRMS | 198.33  | 2.55  | 0.17  |
| Mali  | Malic acid                | Positive | GC-MS/MS   | 120.25  | 2.35  | 2.06  |
| Man   | Mannose                   | Positive | GC-MS/MS   | 0.90    | 9.65  | 4.21  |
| M6P   | Mannose-6-phosphate       | Positive | GC-MS/MS   | 0.42    | 6.05  | 4.24  |
| Met   | Methionine                | Positive | GC-MS/MS   | 23.13   | 2.10  | 0.79  |
| MVA   | Mevalonic acid            | Negative | HILIC-HRMS | 6.84    | 46.13 | 4.25  |
| OAS   | N-Acetylserine            | Positive | HILIC-HRMS | 2669.10 | 2.26  | 0.18  |
| NAD+  | NAD+                      | Negative | HILIC-HRMS | 36.58   | 3.31  | 0.74  |
| NADH  | NADH                      | Positive | HILIC-HRMS | 278.00  | 4.33  | 0.63  |
| NADP+ | NADP+                     | Positive | HILIC-HRMS | 3.37    | 7.10  | 17.71 |
| NAA   | Nicotinamide              | Positive | HILIC-HRMS | 6.77    | 11.68 | 24.92 |
| Orn   | Ornithine                 | Positive | HILIC-HRMS | 487.19  | 2.75  | 0.92  |
| Phe   | Phenylalanine             | Positive | HILIC-HRMS | 8.78    | 2.78  | 1.98  |
| Pro   | Proline                   | Positive | HILIC-HRMS | 239.93  | 2.49  | 0.31  |
| PsU   | Pseudouridine             | Negative | HILIC-HRMS | 0.87    | 18.51 | 20.97 |
| R5P   | Ribose-5-phosphate        | Positive | GC-MS/MS   | 16.40   | 2.91  | 1.54  |
| SAH   | S-Adenosyl-L-homocysteine | Positive | HILIC-HRMS | 2.29    | 3.29  | 3.00  |
| S7P   | Sedoheptulose-7-phosphate | Positive | GC-MS/MS   | 1.68    | 3.03  | 3.43  |
| Ser   | Serine                    | Positive | HILIC-HRMS | 183.18  | 2.20  | 4.02  |
| Sped  | Spermidine                | Positive | HILIC-HRMS | 3.77    | 45.74 | 19.27 |
| Suc   | Succinic acid             | Negative | HILIC-HRMS | 108.64  | 3.00  | 0.80  |
| Thr   | Threonine                 | Positive | HILIC-HRMS | 101.79  | 3.24  | 2.17  |
| Trp   | Tryptophan                | Positive | HILIC-HRMS | 1.82    | 3.22  | 0.40  |
| Tyr   | Tyrosine                  | Positive | HILIC-HRMS | 6.47    | 3.24  | 4.86  |
| Uri   | Uridine                   | Negative | HILIC-HRMS | 0.87    | 18.51 | 20.97 |
| UMP   | Uridine monophosphate     | Negative | HILIC-HRMS | 28.20   | 6.19  | 2.36  |
| Val   | Valine                    | Positive | GC-MS/MS   | 60.41   | 2.70  | 1.58  |

**Table S4.** Stability data from some selected metabolites of in-house yeast-based reference materials. Three different time measurements were carried out within 6 months, with six replicates quantification for each metabolite (n = 6).

| Compound   | Method     | 0 months                           |        | 3 months                           |        | 6 months                           |        |
|------------|------------|------------------------------------|--------|------------------------------------|--------|------------------------------------|--------|
|            |            | Average (nmol vial <sup>-1</sup> ) | CV (%) | Average (nmol vial <sup>-1</sup> ) | CV (%) | Average (nmol vial <sup>-1</sup> ) | CV (%) |
| 2PG        | GC-MS      | 0.06                               | 21.86  | 0.07                               | 17.48  | 0.07                               | 13.34  |
| 3PG        | GC-MS/MS   | 0.55                               | 2.14   | 0.55                               | 2.32   | 0.48                               | 2.79   |
| cis-Ac     | GC-MS/MS   | 1.61                               | 4.78   | 1.52                               | 5.28   | 1.08                               | 4.64   |
| Ade        | HILIC-HRMS | 0.46                               | 13.07  | 0.46                               | 15.28  | 0.58                               | 3.79   |
| Ala        | HILIC-HRMS | 902.32                             | 3.83   | 1021.94                            | 2.11   | 940.57                             | 2.93   |
| AAD        | GC-MS/MS   | 16.82                              | 1.42   | 16.60                              | 1.39   | 16.81                              | 4.81   |
| AKG        | GC-MS/MS   | 30.94                              | 21.20  | 34.43                              | 22.27  | 29.16                              | 7.54   |
| Arg        | HILIC-HRMS | 881.55                             | 6.80   | 1037.72                            | 4.90   | 949.28                             | 3.35   |
| Asn        | HILIC-HRMS | 115.94                             | 12.81  | 135.70                             | 14.42  | 222.17                             | 19.65  |
| CA         | GC-MS/MS   | 27.17                              | 1.06   | 27.07                              | 1.33   | 25.21                              | 1.34   |
| Cit        | HILIC-HRMS | 86.13                              | 10.55  | 90.86                              | 13.09  | 92.05                              | 3.33   |
| cGMP       | HILIC-HRMS | 0.27                               | 17.07  | 0.33                               | 13.87  | 0.41                               | 7.17   |
| CYS        | GC-MS/MS   | 66.38                              | 0.96   | 62.02                              | 1.41   | 60.22                              | 1.84   |
| DHAP       | GC-MS/MS   | 0.10                               | 90.77  | 0.10                               | 92.72  | 0.04                               | 26.92  |
| FAD        | HILIC-HRMS | 1.57                               | 36.84  | 1.41                               | 22.48  | 1.50                               | 4.70   |
| Fuc        | GC-MS/MS   | 0.83                               | 19.61  | 1.05                               | 18.14  | 1.06                               | 39.32  |
| F6P        | GC-MS/MS   | 0.35                               | 51.12  | 0.40                               | 52.61  | 0.25                               | 36.84  |
| Fum        | GC-MS/MS   | 27.95                              | 4.88   | 28.11                              | 8.22   | 26.63                              | 7.16   |
| GA         | GC-MS/MS   | 2.66                               | 2.72   | 2.72                               | 0.78   | 2.60                               | 2.11   |
| Glc+Man-Ol | GC-MS/MS   | 5.90                               | 7.54   | 6.67                               | 8.89   | 6.57                               | 11.18  |
| G6P        | GC-MS/MS   | 1.20                               | 10.40  | 1.32                               | 14.03  | 1.18                               | 7.82   |
| Glu-Cys    | HILIC-HRMS | 3.00                               | 41.71  | 1.88                               | 26.28  | 1.89                               | 11.30  |
| GSSG       | HILIC-HRMS | 58.79                              | 9.08   | 55.21                              | 9.27   | 81.96                              | 8.43   |
| GSH        | HILIC-HRMS | 172.75                             | 15.98  | 132.66                             | 13.74  | 189.33                             | 6.62   |
| G3P        | GC-MS/MS   | 29.69                              | 3.75   | 25.94                              | 3.15   | 20.07                              | 5.23   |
| Gly        | GC-MS/MS   | 64.91                              | 0.47   | 67.12                              | 0.72   | 61.96                              | 3.91   |
| Gnin       | HILIC-HRMS | 0.11                               | 9.10   | 0.03                               | 155.64 | 0.11                               | 4.14   |
| Gsin       | HILIC-HRMS | 0.28                               | 5.15   | 0.17                               | 8.72   | 0.18                               | 10.84  |
| His        | HILIC-HRMS | 99.00                              | 3.55   | 79.07                              | 10.89  | 82.91                              | 5.31   |
| Hse        | GC-MS/MS   | 5.18                               | 8.38   | 6.37                               | 6.01   | 6.07                               | 13.56  |
| Iso        | GC-MS/MS   | 0.91                               | 4.33   | 0.82                               | 5.85   | 1.03                               | 4.00   |
| Ile        | GC-MS/MS   | 15.59                              | 1.10   | 15.25                              | 2.27   | 14.75                              | 5.51   |
| KYN        | HILIC-HRMS | 0.25                               | 12.62  | 0.32                               | 11.01  | 0.30                               | 15.88  |
| Leu        | GC-MS/MS   | 8.11                               | 3.10   | 8.42                               | 3.02   | 9.59                               | 5.48   |
| Lys        | HILIC-HRMS | 122.79                             | 3.92   | 151.08                             | 16.39  | 135.31                             | 2.01   |
| Mali       | GC-MS/MS   | 80.47                              | 1.21   | 81.24                              | 1.19   | 78.86                              | 2.04   |
| Man        | GC-MS/MS   | 0.32                               | 16.43  | 0.25                               | 34.02  | 0.28                               | 16.66  |
| M6P        | GC-MS/MS   | 0.28                               | 19.82  | 0.33                               | 16.94  | 0.34                               | 14.41  |
| Met        | GC-MS/MS   | 15.75                              | 1.86   | 16.85                              | 2.77   | 14.69                              | 2.44   |
| OAS        | HILIC-HRMS | 2192.49                            | 5.42   | 1930.60                            | 7.55   | 1906.06                            | 3.15   |
| NADH       | HILIC-HRMS | 102.54                             | 47.63  | 94.19                              | 46.91  | 174.75                             | 38.72  |
| Phe        | GC-MS/MS   | 6.48                               | 1.76   | 6.83                               | 2.76   | 6.39                               | 8.28   |



|      |            |        |       |        |      |        |       |
|------|------------|--------|-------|--------|------|--------|-------|
| Pro  | GC-MS/MS   | 298.40 | 0.98  | 309.56 | 1.16 | 292.40 | 2.08  |
| S7P* | GC-MS/MS   | 0.43   | 27.93 | -      | -    | 0.45   | 15.78 |
| Ser  | GC-MS/MS   | 152.53 | 1.14  | 157.95 | 1.25 | 146.67 | 3.03  |
| Suc  | GC-MS/MS   | 20.40  | 0.78  | 21.89  | 1.22 | 20.71  | 1.82  |
| Thr  | GC-MS/MS   | 101.18 | 1.03  | 109.98 | 1.22 | 104.15 | 1.59  |
| Trp  | HILIC-HRMS | 0.93   | 4.97  | 1.05   | 9.15 | 1.30   | 18.64 |
| Tyr  | HILIC-HRMS | 3.87   | 3.37  | 3.87   | 5.57 | 3.60   | 8.59  |
| Val  | GC-MS/MS   | 40.43  | 0.84  | 43.25  | 1.00 | 41.20  | 2.21  |

**Note:** \*Data not included due to outlier data Sedoheptulose-7-phosphate (S7P) for measurement 2. All measurements were performed in positive mode.

**Table S5.** Inter-batch biological reproducibility from some selected metabolites of in-house yeast-based reference materials. Six replicate measurements were performed for evaluating three different inter-batch variabilities (n = 3).

| Compound   | Polarity | Method     | Average Concentration (nmol vial <sup>-1</sup> ) |                       |                       | Inter-batch CV (%) |
|------------|----------|------------|--------------------------------------------------|-----------------------|-----------------------|--------------------|
|            |          |            | 1 <sup>st</sup> batch                            | 2 <sup>nd</sup> batch | 3 <sup>rd</sup> batch |                    |
| AMP+AMP    | Negative | HILIC-HRMS | 98.17                                            | 69.47                 | 80.99                 | 17.43              |
| 2PG        | Positive | GC-MS/MS   | 0.07                                             | 0.15                  | 0.17                  | 41.88              |
| K-IVaI     | Negative | HILIC-HRMS | 4.38                                             | 1.55                  | 4.41                  | 47.66              |
| 3PG        | Positive | GC-MS/MS   | 0.48                                             | 1.04                  | 1.01                  | 37.46              |
| MTAP       | Positive | HILIC-HRMS | 2.68                                             | 4.08                  | 4.00                  | 21.95              |
| cis-Ac     | Negative | HILIC-HRMS | 0.52                                             | 0.29                  | 0.27                  | 38.88              |
| Ade        | Positive | HILIC-HRMS | 0.33                                             | 0.50                  | 0.42                  | 19.89              |
| Asin       | Positive | HILIC-HRMS | 2.40                                             | 1.43                  | 1.36                  | 33.48              |
| ADP        | Positive | HILIC-HRMS | 80.32                                            | 84.71                 | 87.19                 | 4.14               |
| Ala        | Positive | HILIC-HRMS | 922.80                                           | 1039.59               | 1051.65               | 7.08               |
| AAD        | Positive | GC-MS/MS   | 16.81                                            | 34.27                 | 22.67                 | 36.15              |
| AKG        | Positive | GC-MS/MS   | 29.16                                            | 34.57                 | 79.91                 | 58.21              |
| Arg        | Positive | HILIC-HRMS | 1003.58                                          | 957.12                | 1161.73               | 10.31              |
| ASA        | Positive | HILIC-HRMS | 12.04                                            | 18.15                 | 23.16                 | 31.32              |
| Asn        | Positive | HILIC-HRMS | 112.16                                           | 97.79                 | 102.72                | 7.00               |
| Asp        | Positive | HILIC-HRMS | 1932.76                                          | 1695.58               | 1627.90               | 9.14               |
| Car        | Positive | HILIC-HRMS | 0.91                                             | 0.89                  | 0.90                  | 1.13               |
| CA         | Positive | GC-MS/MS   | 25.21                                            | 22.44                 | 22.57                 | 6.68               |
| Cit        | Positive | HILIC-HRMS | 87.69                                            | 90.83                 | 93.96                 | 3.45               |
| cGMP       | Positive | HILIC-HRMS | 0.26                                             | 0.15                  | 0.44                  | 51.33              |
| CYS        | Positive | HILIC-HRMS | 65.21                                            | 55.27                 | 65.65                 | 9.46               |
| Ctd        | Positive | HILIC-HRMS | 0.15                                             | 0.14                  | 0.14                  | 5.57               |
| CMP        | Positive | HILIC-HRMS | 9.85                                             | 8.06                  | 8.96                  | 9.98               |
| DHAP       | Positive | GC-MS/MS   | 0.04                                             | 0.05                  | 0.04                  | 12.25              |
| DHIV       | Negative | HILIC-HRMS | 10.57                                            | 6.61                  | 9.51                  | 23.00              |
| FAD        | Positive | HILIC-HRMS | 1.26                                             | 1.34                  | 1.54                  | 10.35              |
| Fuc        | Positive | GC-MS/MS   | 1.08                                             | 5.30                  | 4.58                  | 61.89              |
| F6P        | Positive | GC-MS/MS   | 0.25                                             | 0.56                  | 0.57                  | 39.67              |
| Fum        | Positive | GC-MS/MS   | 26.63                                            | 36.89                 | 31.38                 | 16.23              |
| GA         | Positive | GC-MS/MS   | 2.60                                             | 2.51                  | 3.26                  | 14.73              |
| Glc+Man-OI | Positive | GC-MS/MS   | 6.50                                             | 17.43                 | 11.50                 | 46.34              |
| G6P        | Positive | GC-MS/MS   | 1.18                                             | 1.77                  | 1.54                  | 19.66              |
| Glu        | Negative | HILIC-HRMS | 2015.15                                          | 3096.21               | 2889.74               | 21.52              |
| Gln        | Positive | HILIC-HRMS | 966.80                                           | 887.86                | 748.68                | 12.73              |
| Glu-Cys    | Positive | HILIC-HRMS | 4.13                                             | 4.24                  | 4.88                  | 9.22               |
| GSSG       | Positive | HILIC-HRMS | 72.02                                            | 99.71                 | 106.02                | 19.54              |
| GSH        | Positive | HILIC-HRMS | 286.12                                           | 280.94                | 257.31                | 5.59               |
| G3P        | Positive | GC-MS/MS   | 19.94                                            | 17.65                 | 12.70                 | 22.08              |
| Gly        | Positive | GC-MS/MS   | 61.96                                            | 63.54                 | 63.66                 | 1.51               |
| Gnin       | Positive | HILIC-HRMS | 0.11                                             | 0.16                  | 0.15                  | 20.42              |
| Gsin       | Positive | HILIC-HRMS | 0.18                                             | 0.18                  | 0.19                  | 2.90               |
| GMP        | Positive | HILIC-HRMS | 13.24                                            | 12.32                 | 13.18                 | 3.99               |

|       |          |            |         |         |         |       |
|-------|----------|------------|---------|---------|---------|-------|
| His   | Positive | HILIC-HRMS | 83.99   | 89.71   | 87.77   | 3.34  |
| Hse   | Positive | HILIC-HRMS | 6.17    | 6.04    | 5.73    | 3.80  |
| Isin  | Positive | HILIC-HRMS | 0.22    | 0.21    | 0.23    | 4.16  |
| IMP   | Positive | HILIC-HRMS | 0.96    | 1.42    | 0.82    | 29.39 |
| Iso   | Positive | GC-MS/MS   | 1.03    | 0.54    | 0.72    | 32.38 |
| Igsin | Positive | HILIC-HRMS | 0.34    | 0.33    | 0.34    | 1.33  |
| Ile   | Positive | HILIC-HRMS | 14.77   | 13.53   | 15.96   | 8.23  |
| KYN   | Positive | HILIC-HRMS | 0.80    | 0.85    | 0.84    | 3.06  |
| Leu   | Positive | HILIC-HRMS | 9.64    | 11.38   | 12.94   | 14.61 |
| Lys   | Positive | GC-MS/MS   | 140.59  | 151.64  | 161.91  | 7.04  |
| Mali  | Positive | GC-MS/MS   | 78.86   | 135.71  | 120.25  | 26.34 |
| Man   | Positive | GC-MS/MS   | 0.28    | 0.42    | 0.90    | 61.34 |
| M6P   | Positive | GC-MS/MS   | 0.34    | 0.45    | 0.42    | 14.45 |
| Met   | Positive | HILIC-HRMS | 13.42   | 17.05   | 18.22   | 15.40 |
| MVA   | Negative | HILIC-HRMS | 4.45    | 5.53    | 6.84    | 21.28 |
| OAS   | Positive | HILIC-HRMS | 1880.31 | 2859.47 | 2669.10 | 21.02 |
| NAD+  | Negative | HILIC-HRMS | 28.84   | 26.71   | 36.58   | 16.92 |
| NADH  | Positive | HILIC-HRMS | 125.03  | 362.02  | 278.00  | 47.12 |
| NADP+ | Positive | HILIC-HRMS | 3.97    | 3.40    | 3.37    | 9.45  |
| NAA   | Positive | HILIC-HRMS | 6.31    | 4.18    | 6.77    | 24.06 |
| Orn   | Positive | HILIC-HRMS | 447.68  | 316.18  | 487.19  | 21.47 |
| Phe   | Positive | HILIC-HRMS | 6.27    | 9.38    | 8.78    | 20.26 |
| Pro   | Positive | HILIC-HRMS | 265.79  | 229.94  | 239.93  | 7.54  |
| PsU   | Negative | HILIC-HRMS | 0.77    | 0.78    | 0.87    | 6.67  |
| R5P   | Positive | GC-MS/MS   | 11.84   | 20.25   | 16.40   | 26.06 |
| SAH   | Positive | HILIC-HRMS | 2.37    | 2.15    | 2.29    | 4.76  |
| S7P   | Positive | GC-MS/MS   | 0.45    | 2.00    | 1.68    | 59.40 |
| Ser   | Positive | HILIC-HRMS | 155.64  | 209.45  | 183.18  | 14.72 |
| Sped  | Positive | HILIC-HRMS | 1.89    | 1.23    | 3.77    | 57.35 |
| Suc   | Positive | GC-MS/MS   | 20.71   | 72.63   | 112.07  | 66.92 |
| Thr   | Positive | HILIC-HRMS | 100.92  | 106.77  | 101.79  | 3.06  |
| Trp   | Positive | HILIC-HRMS | 1.10    | 2.04    | 1.82    | 29.75 |
| Tyr   | Positive | HILIC-HRMS | 3.73    | 7.22    | 6.47    | 31.57 |
| Uri   | Negative | HILIC-HRMS | 0.77    | 0.78    | 0.87    | 6.67  |
| UMP   | Negative | HILIC-HRMS | 22.21   | 22.49   | 28.20   | 13.90 |
| Val   | Positive | GC-MS/MS   | 41.20   | 66.37   | 60.41   | 23.48 |

**Table S6.** In-house yeast-based standard reference materials interlaboratory comparison from some selected metabolites. Quantitative analysis was carried out using both HILIC-HRMS and GC-MS/MS methods with positive mode conditions. Six replicate measurements were performed using the external calibration strategies with additional fully <sup>13</sup>C-labeled internal standards (n = 6).

| Compound                | Abbre. | HILIC-HRMS             |           | GC-MS/MS               |           |
|-------------------------|--------|------------------------|-----------|------------------------|-----------|
|                         |        | Average<br>(nmol/vial) | CV<br>(%) | Average<br>(nmol/vial) | CV<br>(%) |
| alpha-Aminoadipic acid  | AAD    | 21.64                  | 3.78      | 22.67                  | 9.52      |
| alpha-Ketoglutaric acid | AKG    | 85.51                  | 9.87      | 79.91                  | 5.75      |
| Cystathionine           | CYS    | 65.65                  | 2.70      | 60.71                  | 2.71      |
| Fructose-6-phosphate    | F6P    | 1.04                   | 68.77     | 0.57                   | 6.66      |
| Fumaric acid            | Fum    | 26.89                  | 4.94      | 31.38                  | 1.19      |
| Homoserine              | Hse    | 5.73                   | 2.81      | 4.14                   | 3.78      |
| Lysine                  | Lys    | 198.33                 | 2.55      | 161.91                 | 2.34      |
| Methionine              | Met    | 18.22                  | 2.98      | 23.13                  | 2.10      |
| Phenylalanine           | Phe    | 8.78                   | 2.78      | 8.30                   | 2.76      |
| Serine                  | Ser    | 183.18                 | 2.20      | 156.06                 | 5.23      |
| Succinic acid           | Suc    | 108.05                 | 3.32      | 112.07                 | 1.31      |
| Threonine               | Thr    | 101.79                 | 3.24      | 96.85                  | 3.52      |
| Tryptophan              | Trp    | 1.82                   | 3.22      | 1.87                   | 7.24      |

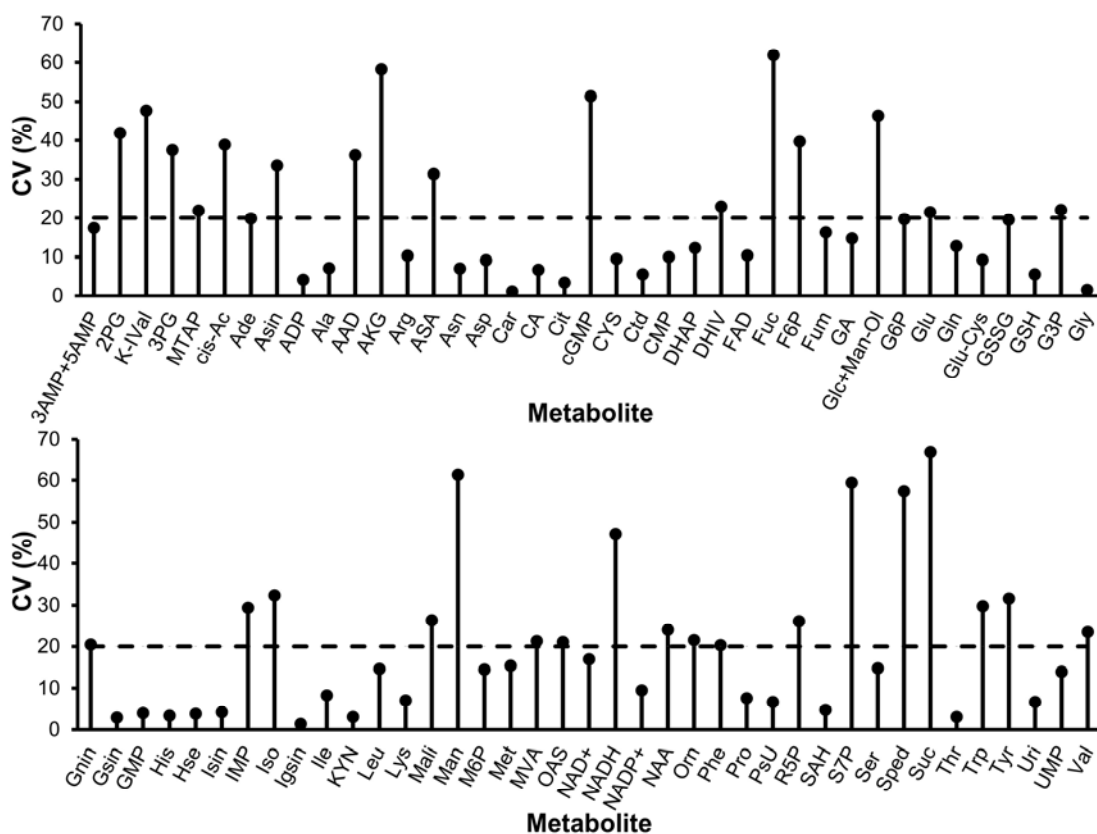

**Fig. S1.** Inter-batch biological reproducibility for in-house yeast-based standard reference materials. Selected metabolites were quantitatively analyzed by HILIC-HRMS and GC-MS/MS under positive mode conditions. External calibration with the addition of a fully  $^{13}\text{C}$ -labeled internal standard was performed for metabolite measurement. The graph shows relative standard deviations (% CV) of metabolites between the different batches ( $n = 3$ ). The CV calculation is based on the mean values obtained from six vials from each batch. The dashed line indicates a CV of 20%.

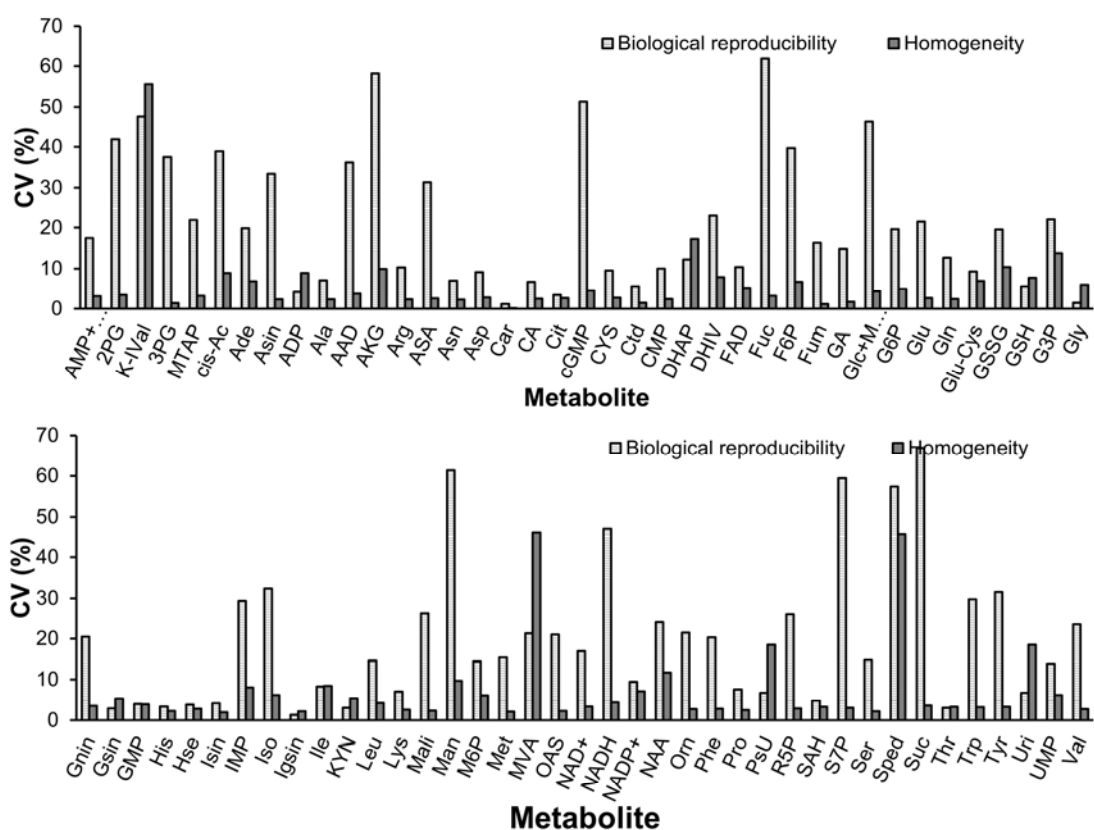

**Fig. S2.** Variability comparison between biological reproducibility and homogeneity for in-house yeast-based standard reference materials. Metabolite measurement was performed by HILIC-HRMS and GC-MS/MS in positive and negative mode conditions. Six replicate samples with additional fully  $^{13}\text{C}$ -labeled internal standards were carried out using the external calibration strategies ( $n = 6$ ).

## Assessment of uncertainty for metabolite quantification in reference material

Uncertainty budget was estimated for threonine as an example of representative metabolite in yeast-based reference material that quantified by GC-MS/MS according to the bottom-up approach in terms of the uncertainty of the measurement and calibration procedure. All possible source parameters associated with concentration quantification ( $C_{Thr}$ ) using standard calibration were identified, and the standard uncertainty of each input parameter was evaluated, followed by estimated uncertainty contribution (Table 1). Those potential identified input parameters associated with quantity values were the purity of the standard compound ( $P$ ), the mass of the standard compound ( $m$ ), the volume of stock standard solution ( $V_{stock}$ ), and the volume of dilution solvent ( $V_{dillut}$ ). Other input variables from analytical measurements, such as relative response of the areas in ( $RR Area_{std}$ ) in standards and sample ( $RR Area_{smp}$ ) contributed to the total combined uncertainty quantification as well.

**Table S7.** Characterization and quantification of uncertainty source for the preparation of standard calibration for threonine quantification in reference material

| Input quantity                      | Type of distribution | Unit                    | Value           | Absolute standard uncertainty | Relative standard uncertainty (%) | Relative contribution to combined uncertainty <sup>f)</sup> (%) |
|-------------------------------------|----------------------|-------------------------|-----------------|-------------------------------|-----------------------------------|-----------------------------------------------------------------|
| $P$                                 | Rectangular          | %                       | 98.00           | 1.00 <sup>a)</sup>            | 1.02                              | 0.88                                                            |
| $m$                                 | Rectangular          | mg                      | 7.92            | 0.001 <sup>b)</sup>           | 0.01                              | 0.38                                                            |
| $V_{stock}$                         | Triangular           | $\mu\text{L}$           | 162.81          | 0.60 <sup>c)</sup>            | 0.37                              | 0.07                                                            |
| $V_{dillut}$                        | Triangular           | $\mu\text{L}$           | 50.00 - 3711.00 | 0.20 - 15.00 <sup>c)</sup>    | 0.40                              | 0.21                                                            |
| $RR Area_{std}$                     | Normal               | -                       | 0.292 - 16.014  | 0.01 - 0.80 <sup>d)</sup>     | 3.42-5.00                         | 33.19                                                           |
| $RR Area_{smp}$                     | Normal               | -                       | 7.527           | 0.38 <sup>e)</sup>            | 5.05                              | 65.27                                                           |
| <b>Output quantity<sup>f)</sup></b> |                      |                         |                 | Total combined                | Total combined                    |                                                                 |
| $C_{Thr}$                           | -                    | nmol vial <sup>-1</sup> | 93.54           | 5.96                          | 6.37                              | -                                                               |

<sup>a)</sup> Based on the supplier's certificate

<sup>b)</sup> Estimated from weighing balance specification

<sup>c)</sup> Derived from the pipettes manufacturer specification

<sup>d)</sup> Calculated from injected quality control (QC) standard measurement

<sup>e)</sup> Observed from the technical replicate sample measurement

<sup>f)</sup> Calculated based on propagation procedure using *Monte Carlo* simulation

The established Monte Carlo method was used to estimate total combined measurement uncertainty in this study by randomly generated input quantities within their standard uncertainties. An error propagation procedure with Monte Carlo simulation using @Risk software (Palisade, New York, USA) was performed with  $1 \times 10^3$  random simulations to estimate variable input quantity that contributed to the total combined uncertainty of metabolite quantification in preparation of standard calibration for metabolite quantification. This simulated method not only provided estimating interaction of all probability distribution functions of input variables involved but also understanding the corresponding uncertainty contributions easily and straightforwardly[1]. In general, the results tabulated in **Table S7** showed that the influence of relative response area from standard calibration and sample that

correspond to the total number of ions measured by the respective instrument were the main sources contributing to the overall combined uncertainty of threonine quantification. Both of them contributed more than 90% of the relative total combined uncertainty for threonine quantification in yeast-based reference material using external standard calibration strategies using a fully  $^{13}\text{C}$ -labeled internal standard. The uncertainty related to the weight of the standard metabolite and pipetting volume did not significantly contribute to the total combined uncertainty. Uncertainty calculations associated with the measurement result are systematically assessed by each step of an analytical protocol that contributed to the total uncertainty estimation[2]. In addition, the identification of potential input variables or sources of uncertainty by the bottom-up approach was suitable for improving the experimental procedure with corrective action. This approach also reflected the accuracy of the analytical method used for measurement and comparing determination results from different laboratories[3].

#### References:

1. Guerrasio R, Haberhauer-Troyer C, Steiger M, Sauer M, Mattanovich D, Koellensperger G, Hann S (2013) Measurement uncertainty of isotopologue fractions in fluxomics determined via mass spectrometry. *Anal Bioanal Chem* 405:5133–5146 . <https://doi.org/10.1007/s00216-013-6910-5>
2. Ellison S, Rosslein M, Williams A (2012) EURACHEM/CITAC, quantifying uncertainty in analytical measurement. LGC Teddington [OpenURL](http://www.eurachem.org)
3. Lee S, Choi H, Kim E, Choi H, Chung H, Chung KH (2010) Estimation of the measurement uncertainty by the bottom-up approach for the determination of methamphetamine and amphetamine in urine. *J Anal Toxicol* 34:222–228 . <https://doi.org/10.1093/jat/34.4.222>
